# Supplementary material for: Beneficial Effects of Sideritis clandestina Extracts and Sideridiol against Amyloid β Toxicity
Source: MDPI journal article supplement (doi:10.3390/antiox13030261), 2024-02-21
Supplement: s1 [file s1]

Supplementary file

# Beneficial effects of *Sideritis clandestina* extracts and sideridiol against amyloid $\beta$ toxicity

Anna Gioran <sup>1,†</sup>, Yiorgos Paikopoulos <sup>1,†,‡</sup>, Eleni Panagiotidou <sup>1,2</sup>, Aikaterini E. I. Rizou <sup>3,§</sup>, Georgia I. Nasi <sup>3</sup>, Virginia D. Dimaki <sup>4</sup>, Konstantina D. Vraila <sup>3</sup>, Dimitra S. Bezantakou <sup>3,§</sup>, Panagiotis M. Spatharas <sup>3,||</sup>, Nikos C. Papandreou <sup>3</sup>, Vassiliki Magafa <sup>4</sup>, Fotini N. Lamari <sup>4</sup>, Vassiliki A. Iconomidou <sup>3</sup> and Niki Chondrogianni <sup>1,\*</sup>

<sup>1</sup> Institute of Chemical Biology, National Hellenic Research Foundation, 48 Vassileos Constantinou Avenue, 11635 Athens, Greece; agioran@eie.gr (A.G.); yiorgos.paikopoulos@isas.de (Y.P.); epanagiotidou@eie.gr (E.P.)

<sup>2</sup> Department of Biochemistry and Biotechnology, University of Thessaly, 41334 Larissa, Greece

<sup>3</sup> Section of Cell Biology and Biophysics, Department of Biology, School of Sciences, National and Kapodistrian University of Athens, Panepistimiopolis, 15701 Athens, Greece; rizoukat@biol.uoa.gr (A.E.I.R.); gnasi@biol.uoa.gr (G.I.N.); vrailakon@biol.uoa.gr (K.D.V.); dimbez@biol.uoa.gr (D.S.B.); panspatharas@biol.uoa.gr (P.M.S.); npapand@biol.uoa.gr (N.C.P.); veconom@biol.uoa.gr (V.A.I.)

<sup>4</sup> Laboratory of Pharmacognosy and Chemistry of Natural Products, Department of Pharmacy, University of Patras, 26504 Patras, Greece; virnadimaki@upatras.gr (V.D.D.); magafa@upatras.gr (V.M.); flam@upatras.gr (F.N.L.)

\* Correspondence: nikichon@eie.gr; Tel.: +30-210-7273768

† These authors contributed equally to this work.

‡ Current address: Leibniz Institute for Analytical Sciences, ISAS e.V., 44227 Dortmund, Germany.

§ Current address: Institute for Bio-Innovation, Biomedical Sciences Research Center “Alexander Fleming”, 16672 Vari, Greece.

|| Current address: European Molecular Biology Laboratory, Hamburg Unit, Notkestrasse 85, 22607 Hamburg, Germany.

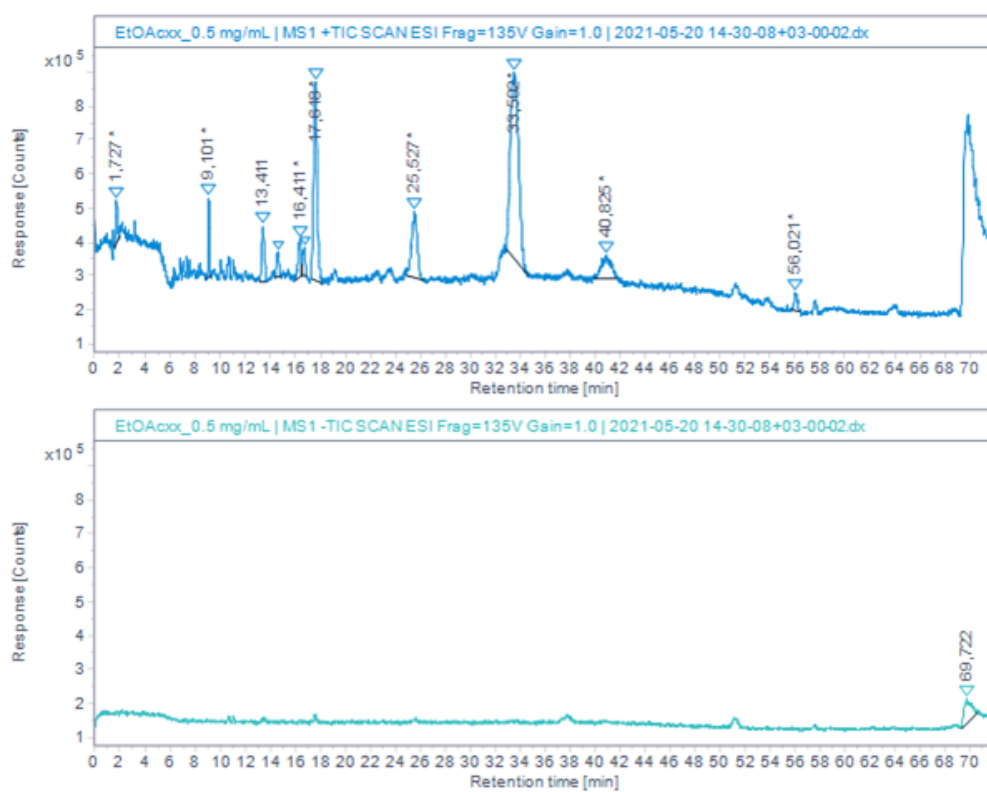

**Figure S1**

**Figure S1.** Total Ion chromatograph after positive (upper) and negative (lower) ionization of the SCP (EtOAc) extract.

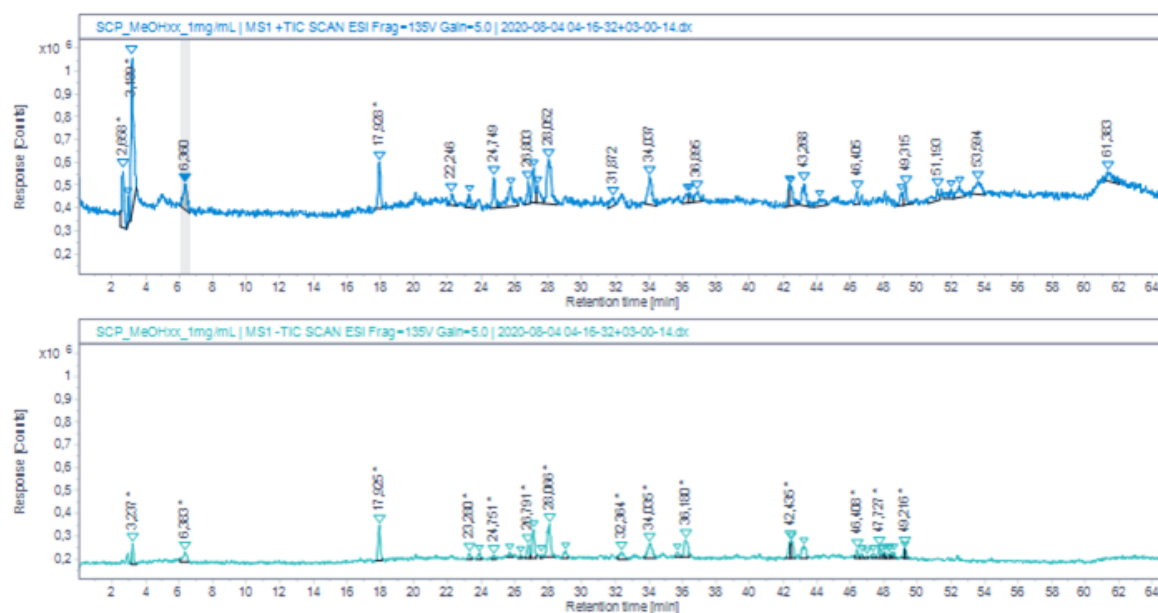

**Figure S2**

**Figure S2.** Total Ion chromatograph after positive (upper) and negative (lower) ionization of the SCP (MeOH) extract.

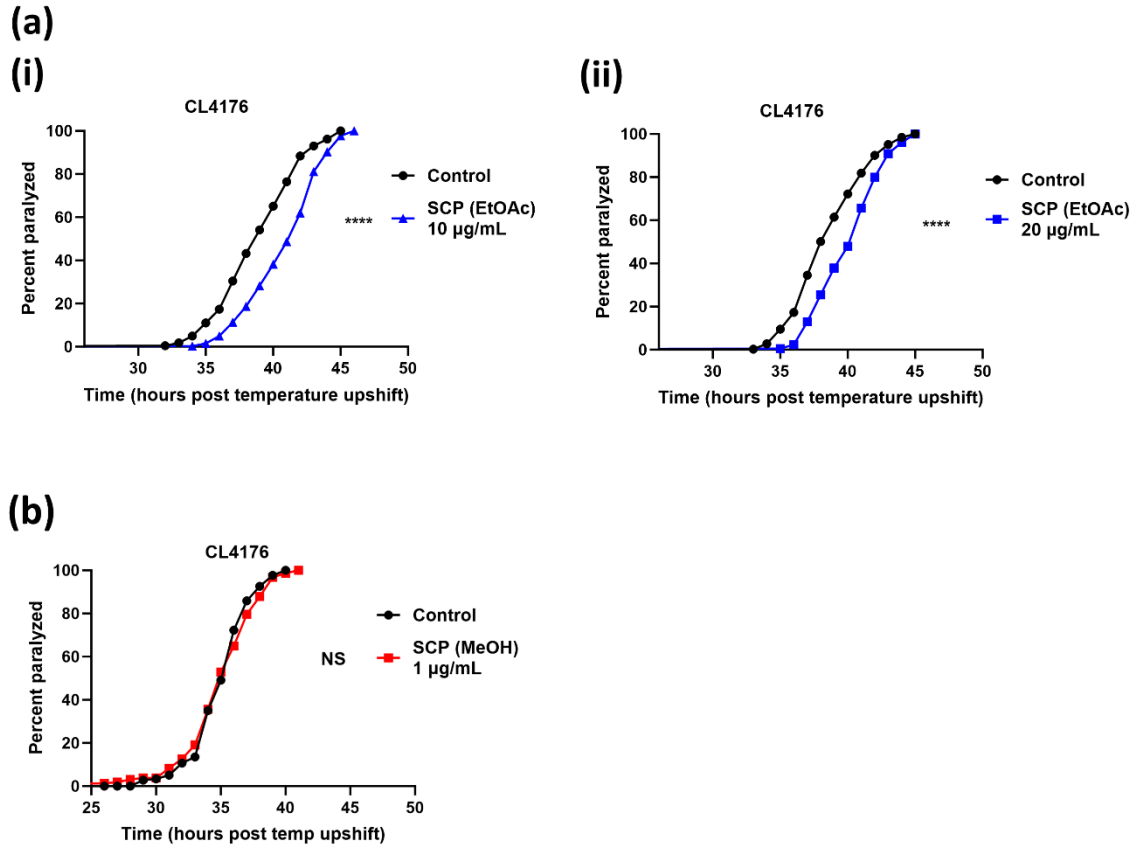

**Figure S3**

**Figure S3.** Treatment with SCP extracts confers protection against A $\beta$  toxicity. Paralysis curves of CL4176 animals treated with SCP (a) EtOAc extract (10 µg/mL in (i) and 20 µg/mL in (ii)); (b) MeOH extract (1 µg/mL) or control (DMSO). (a) (i) Control: mean=39±0.63, n=1387, 10 µg/ml SCP (EtOAc) extract: mean=41±0.84, n=905, 5 independent experiments, \*\*\*\*P<0.0001; (ii) Control: mean=38.67±0.67, n=961, 20 µg/ml SCP (EtOAc) extract: mean=40.67±0.88, n=594, 3 independent experiments, \*\*\*\*P<0.0001; (b) Control: mean=36, n=177, 1 µg/ml SCP (MeOH) extract: mean=35, n=157, 1 independent experiment, NS (not significant). Median paralysis values are expressed as mean ± SEM. N denotes the number of animals that were paralyzed. Curves are the pooled result of the indicated independent experiments. For paralysis experiments the log-rank Mantel-Cox test was used.

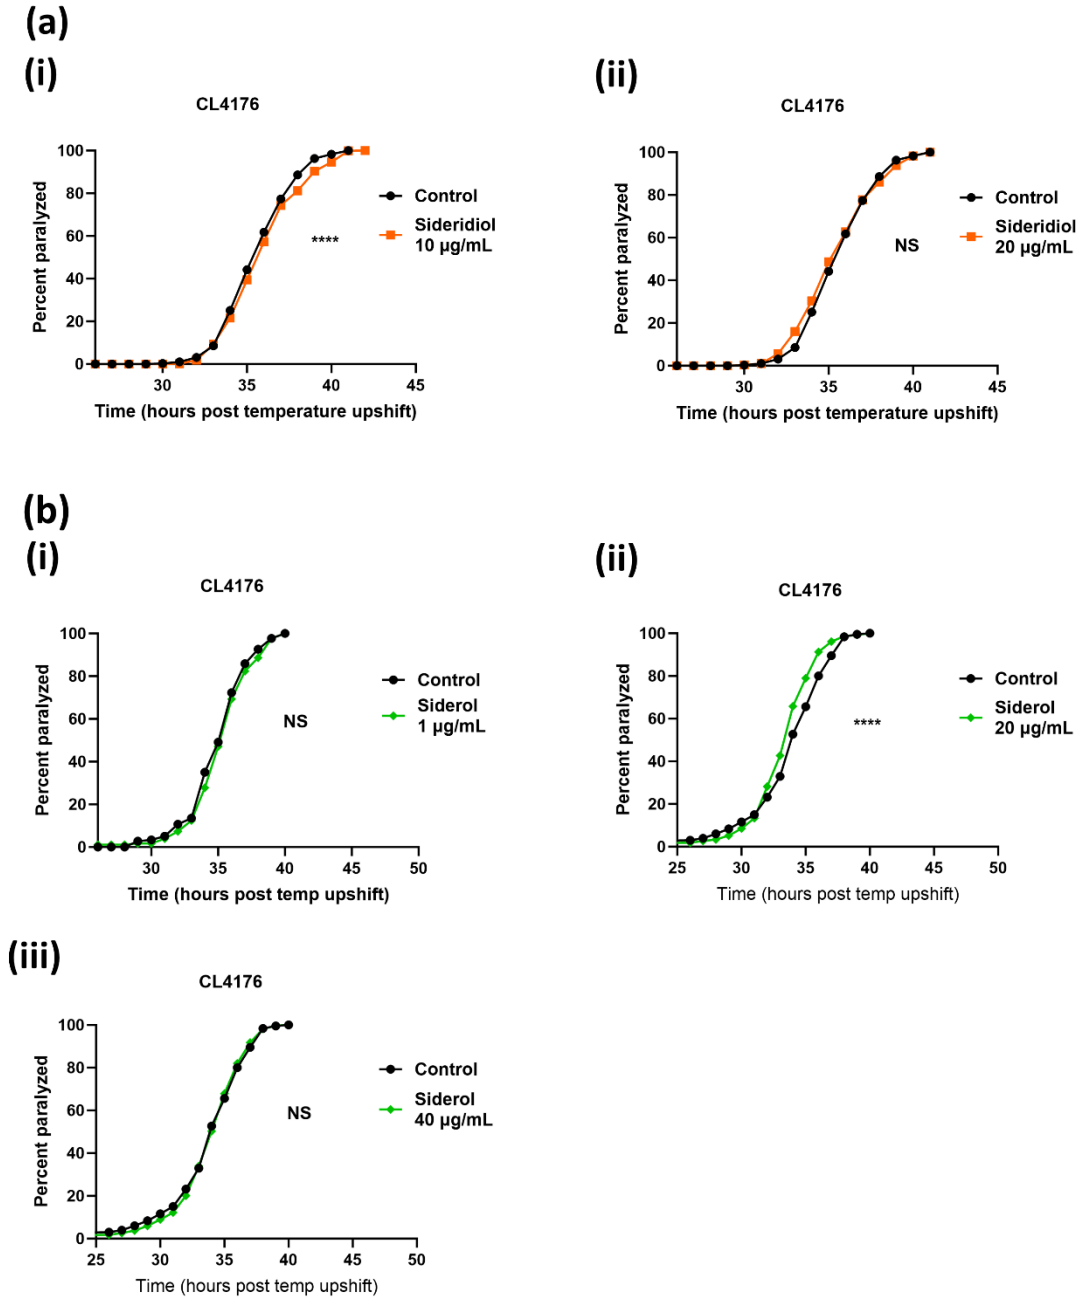

**Figure S4**

**Figure S4.** Sideridiol and not siderol is the main contributor of SCP (EtOAc) extract effects against A $\beta$  toxicity. Paralysis curves of CL4176 animals treated with (a) (i) 10 µg/mL sideridiol; (ii) 20 µg/mL sideridiol; (b) (i) 1 µg/mL siderol; (ii) 20 µg/mL siderol; (iii) 40 µg/mL siderol or control (DMSO). (a) (i) Control: mean=36±0.58, n=1052, 10 µg/mL sideridiol: mean= 36±0.58, n=813, 3 independent experiments, \*\*\*\*P<0.0001; (ii) Control: mean=36±0.58, n=1052, 20 µg/mL sideridiol: mean= 36.33±0.88, n=866, 3 independent experiments, NS (not significant); (b) (i) Control: mean=36, n=177, 1 µg/mL siderol: mean=36, n=176, 1 experiment, NS (not significant); (ii) Control: mean=34.5±0.32, n=431, 20 µg/mL siderol:

mean=34±0, n=599, 2 independent experiments, \*\*\*\*P<0.0001; (iii) Control: mean=34.5±0.32, n=431, 40 µg/mL siderol: mean=34.5±0.41, n=501, 2 independent experiments, NS (not significant). Median paralysis values are expressed as mean ± SEM. N denotes the number of animals that were paralyzed. Curves are the pooled result of the indicated independent experiments. For paralysis experiments the log-rank Mantel-Cox test was used.

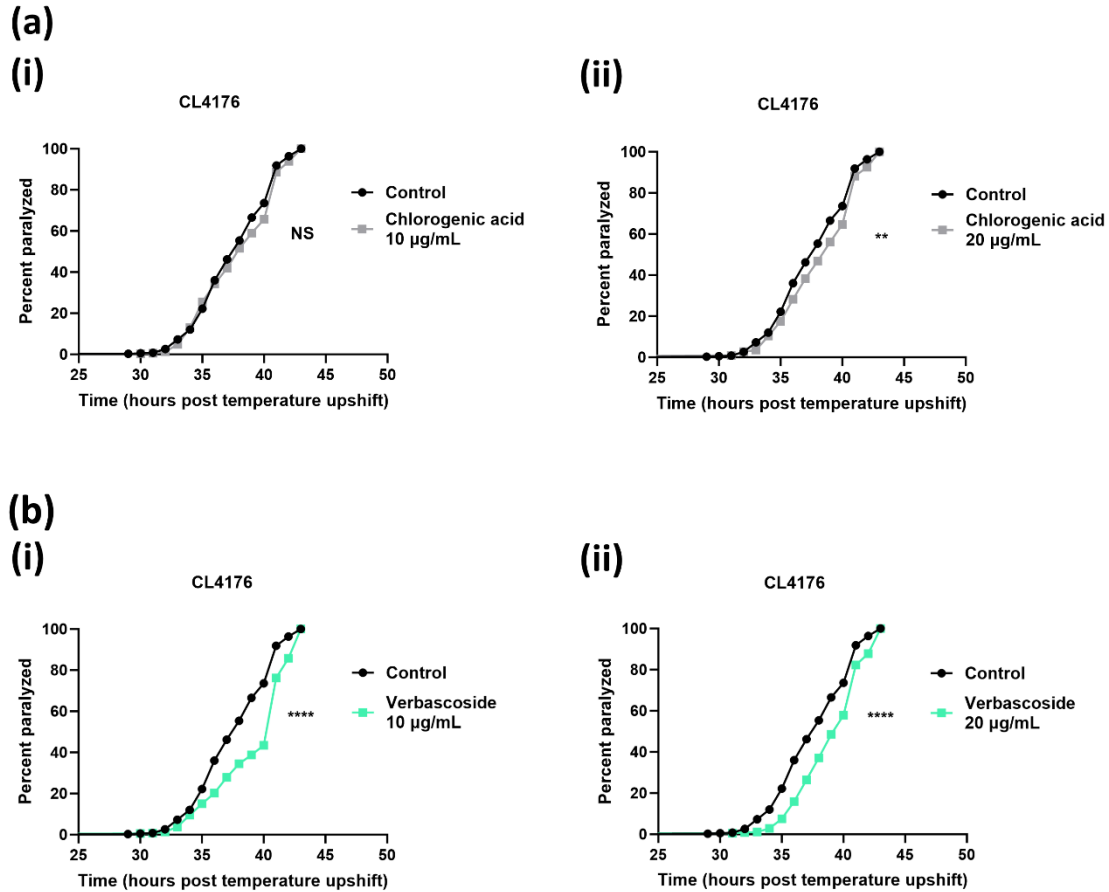

**Figure S5**

**Figure S5.** Verbascoside and not chlorogenic acid is the main contributor of SCP (MeOH) extract effects against A $\beta$  toxicity. Paralysis curves of CL4176 animals treated with (a) (i) 10  $\mu$ g/mL chlorogenic acid; (ii) 20  $\mu$ g/mL chlorogenic acid and; (b) (i) 10  $\mu$ g/mL verbascoside; and (ii) 20  $\mu$ g/mL verbascoside or control (DMSO). (a) (i) Control: mean=38 $\pm$ 1, n=383, 10  $\mu$ g/mL chlorogenic acid: mean= 38.50 $\pm$ 0.50, n=391, 2 independent experiments, NS; (ii) Control: mean=38 $\pm$ 1, n=383, 20  $\mu$ g/mL chlorogenic acid: mean= 39.50 $\pm$ 1.50, n=337, 2 independent experiments, \*\*P<0.01; (b) (i) Control: 38 $\pm$ 1, n=383, 10  $\mu$ g/mL verbascoside: mean=41 $\pm$ 0, n=366, 2 independent experiments, \*\*\*\*P<0.0001; (ii) Control: 38 $\pm$ 1, n=383, 20  $\mu$ g/mL verbascoside: mean=39.50 $\pm$ 0.50, n=344, 2 independent experiments, \*\*\*\*P<0.0001. Median paralysis values are expressed as mean  $\pm$  SEM. N denotes the number of animals that were paralyzed. Curves are the pooled result of the indicated independent experiments. For paralysis experiments the log-rank Mantel-Cox test was used.
